# Supplementary material for: Meiotic gene silencing complex MTREC/NURS recruits the nuclear exosome to YTH-RNA-binding protein Mmi1
Source: PubMed Central journal article supplement (PMC7018101; doi:10.1371/journal.pgen.1008598), 2020-02-03
Supplement: pgen.1008598.s002.pdf [file pgen.1008598.s002.pdf]

## S2 Fig.

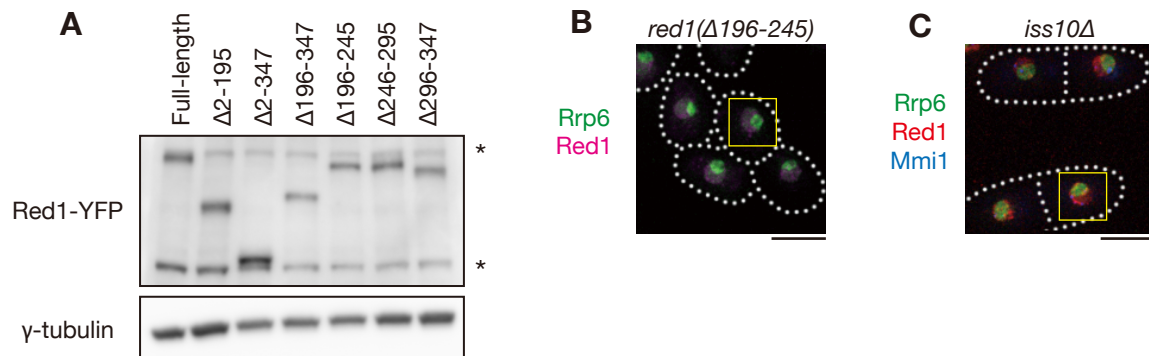

### S2 Fig. Red1( $\Delta 196-245$ ) is defective in Rrp6 foci formation.

(A) Expression levels of truncated Red1 proteins. Cell extracts were prepared from exponentially growing cells expressing wild-type or truncated Red1-YFP in liquid YE medium and immunoblotted with anti-GFP antibody.  $\gamma$ -tubulin was used as a loading control. The asterisks indicate non-specific bands.

(B) Localization of Rrp6 and Red1 in *red1*( $\Delta 196-245$ ) cells. *red1*( $\Delta 196-245$ ) cells expressing Rrp6-YFP (green) and Red1-mCherry (magenta) from the respective endogenous loci were observed. Dotted lines indicate the shape of cells. Boxed region is magnified in Fig 2C.

Scale bar: 5  $\mu$ m.

(C) Localization of Rrp6, Red1 and Mmi1 in *iss10* $\Delta$  cells. *iss10* $\Delta$  cells expressing Rrp6-YFP (green), Red1-mCherry (red) and CFP-Mmi1 (blue) were examined. Boxed region is magnified in Fig 2D. Scale bar: 5  $\mu$ m.
