# Supplementary material for: Meiotic gene silencing complex MTREC/NURS recruits the nuclear exosome to YTH-RNA-binding protein Mmi1
Source: PubMed Central journal article supplement (PMC7018101; doi:10.1371/journal.pgen.1008598), 2020-02-03
Supplement: pgen.1008598.s003.pdf [file pgen.1008598.s003.pdf]

S3 Fig.

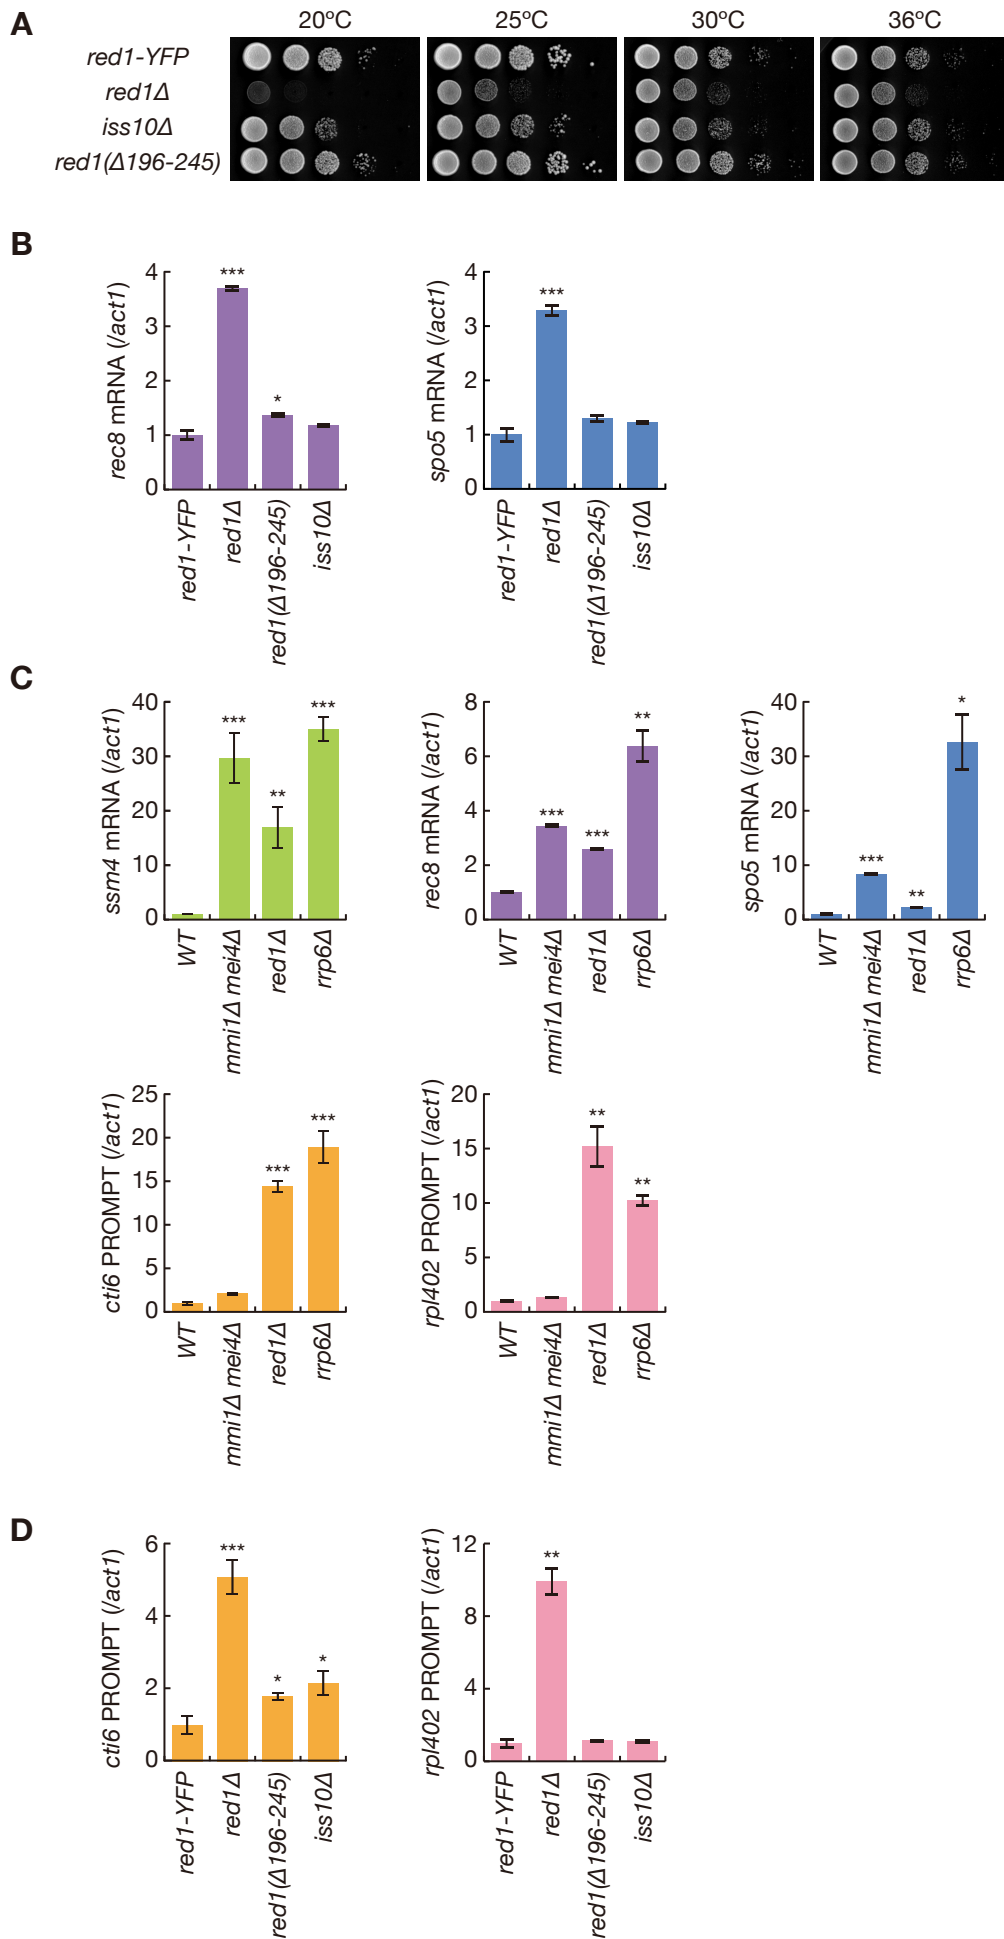

**S3 Fig. Red1( $\Delta$ 196-245) is defective in meiotic transcript degradation.**

(A) Growth profiles of wild-type (*red1-YFP*), *red1* $\Delta$ , *iss10* $\Delta$  and *red1*( $\Delta$ 196-245) cells. Ten-fold serial dilutions of cells were spotted on YE medium and incubated at the indicated temperatures.

(B) Expression of *rec8* mRNA and *spo5* mRNA in wild-type (*red1-YFP*), *red1* $\Delta$ , *iss10* $\Delta$  and *red1*( $\Delta$ 196-245) cells. Transcripts were quantified by RT-qPCR and normalized to *act1*. Error bars represent standard error of three independent samples. \* $P < 0.05$ ; \*\*\* $P < 0.001$  compared with the wild-type *red1-YFP* strain (Student's *t*-test).

(C) Expression of *ssm4* mRNA, *rec8* mRNA, *spo5* mRNA, *cti6* PROMPT and *rpl402* PROMPT in wild-type, *mmi1* $\Delta$  *mei4* $\Delta$ , *red1* $\Delta$  and *rrp6* $\Delta$  cells. Transcripts were quantified by RT-qPCR and normalized to *act1*. Error bars represent standard error of three independent samples. \* $P < 0.05$ ; \*\* $P < 0.01$ ; \*\*\* $P < 0.001$  compared with the wild-type strain (Student's *t*-test).

(D) Expression of *cti6* PROMPT and *rpl402* PROMPT in wild-type (*red1-YFP*), *red1* $\Delta$ , *red1*( $\Delta$ 196-245), and *iss10* $\Delta$  cells. Transcripts were quantified by RT-qPCR and normalized to *act1*. Error bars represent standard error of three independent samples. \* $P < 0.05$ ; \*\* $P < 0.01$ ; \*\*\* $P < 0.001$  compared with the wild-type *red1-YFP* strain (Student's *t*-test).
