# Supplementary material for: Meiotic gene silencing complex MTREC/NURS recruits the nuclear exosome to YTH-RNA-binding protein Mmi1
Source: PubMed Central journal article supplement (PMC7018101; doi:10.1371/journal.pgen.1008598), 2020-02-03
Supplement: pgen.1008598.s005.pdf [file pgen.1008598.s005.pdf]

S5 Fig.

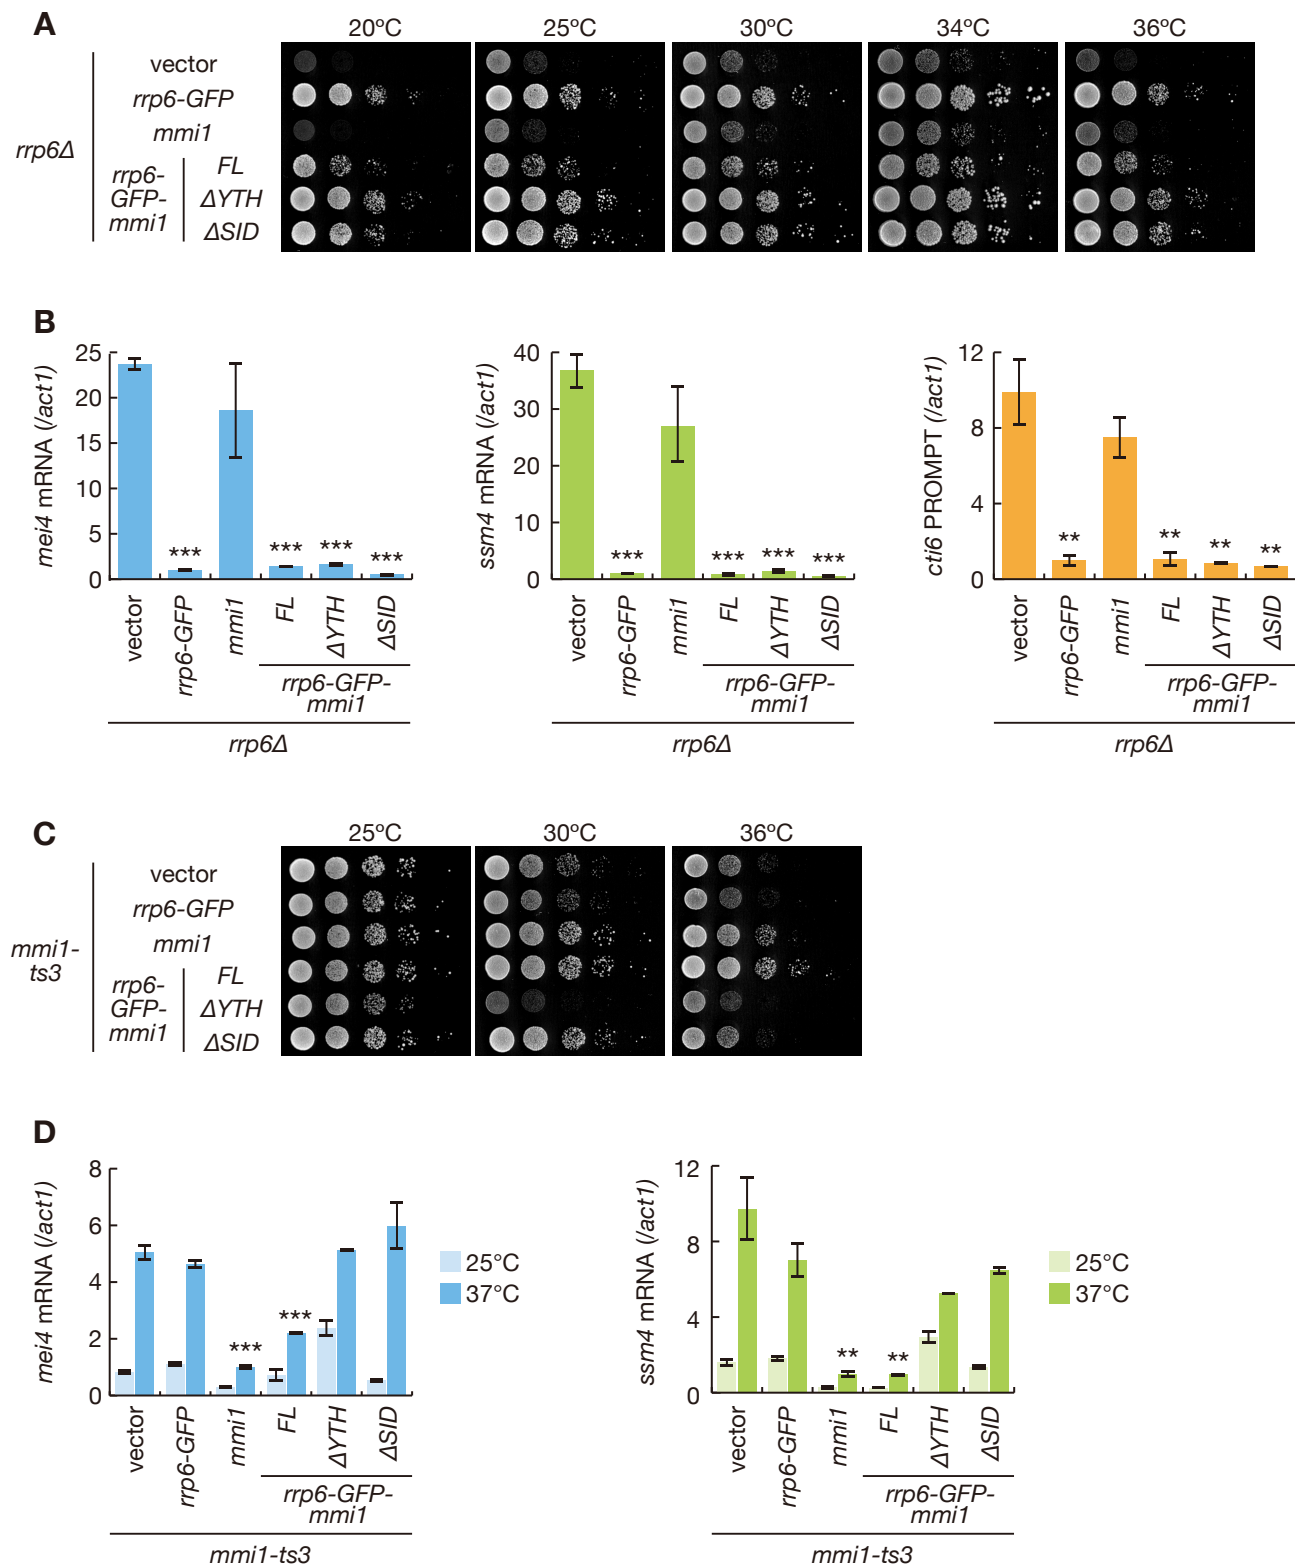

**S5 Fig. Chimeric Rrp6-GFP-Mmi1 protein maintains the function of Rrp6 and Mmi1.**

(A) Growth profiles of *rrp6Δ* cells expressing Red1, Rrp6-GFP, Mmi1, or chimeric proteins composed of Rrp6, GFP, and full-length or truncated Mmi1 from plasmids. Ten-fold serial dilutions of cells were spotted on MM medium and incubated at the indicated temperatures.

(B) Expression of *mei4* mRNA, *ssm4* mRNA, and *cti6* PROMPT in *rrp6Δ* cells expressing Red1, Rrp6-GFP, Mmi1, or chimeric proteins composed of Rrp6, GFP, and full-length or truncated Mmi1 from plasmids. Transcripts were quantified by RT-qPCR and normalized to *act1*. Error bars represent standard error of three independent samples. \*\* $P < 0.01$ ; \*\*\* $P < 0.001$  compared with cells carrying empty vector (Student's *t*-test).

(C) Growth profiles of *mmi1-ts3* cells expressing Red1, Rrp6-GFP, Mmi1, or chimeric proteins composed of Rrp6, GFP, and full-length or truncated Mmi1 from plasmids. Ten-fold serial dilutions of cells were spotted on MM medium and incubated at the indicated temperatures.

(D) Expression of *mei4* mRNA and *ssm4* mRNA in *mmi1-ts3* cells expressing Red1, Rrp6-GFP, Mmi1, or chimeric proteins composed of Rrp6, GFP, and full-length or truncated Mmi1 from plasmids. Cells were grown in liquid MM medium at 25°C and shifted to 37°C for 4 hours. Transcripts were quantified by RT-qPCR and normalized to *act1*. Error bars represent standard error of three independent samples. \*\* $P < 0.01$ ; \*\*\* $P < 0.001$  compared with cells carrying empty vector at 37°C (Student's *t*-test).
