# Supplementary material for: Meiotic gene silencing complex MTREC/NURS recruits the nuclear exosome to YTH-RNA-binding protein Mmi1
Source: PubMed Central journal article supplement (PMC7018101; doi:10.1371/journal.pgen.1008598), 2020-02-03
Supplement: pgen.1008598.s008.pdf [file pgen.1008598.s008.pdf]

**S8 Fig.**

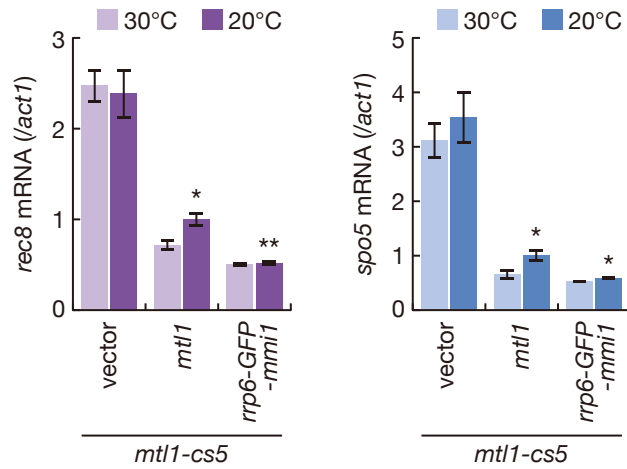

**S8 Fig. Mtl1 mediates interaction between Rrp6 and Mmi1.**

Expression of *rec8* mRNA and *spo5* mRNA in *mtl1-cs5* cells expressing Mtl1 and Rrp6-GFP-Mmi1 from plasmids. Cells were grown in liquid MM medium at 30°C and shifted to 20°C for 2 hours. Transcripts were quantified by RT-qPCR and normalized to *act1*. Error bars represent standard error of three independent samples. \* $P < 0.05$ ; \*\* $P < 0.01$  compared with cells carrying empty vector at 20°C (Student's *t*-test).
