# Supplementary material for: Meiotic gene silencing complex MTREC/NURS recruits the nuclear exosome to YTH-RNA-binding protein Mmi1
Source: PubMed Central journal article supplement (PMC7018101; doi:10.1371/journal.pgen.1008598), 2020-02-03
Supplement: pgen.1008598.s009.pdf [file pgen.1008598.s009.pdf]

**S1 Table. Strains used in this study.**

| Strain name | Genotype                                                                                  | Figure                                             | Derived from |
|-------------|-------------------------------------------------------------------------------------------|----------------------------------------------------|--------------|
| JS59        | <i>h90 ade6-M216 leu1 red1::bsdR</i>                                                      | 2E, 4A, 4D, S3A, S3B, S3C, S3D, S6A, S6B, S6C, S6E | Ref. 33      |
| JS96        | <i>h90 ade6-M210 leu1 ura4-D18 mmi1::kanR mei4::ura4+</i>                                 | S3C                                                | Ref. 33      |
| JS127       | <i>h90 ade6-M210 leu1 rrp6-YFP-bsdR red1-mCherry-hphR natR-CFP-mmi1</i>                   | 1A, S1A                                            | This study   |
| JS128       | <i>h90 ade6-M216 leu1 ura4-D18 red1::bsdR rrp6-YFP-kanR LEU2-CFP-mmi1</i>                 | 1A, S1A                                            | This study   |
| JS129       | <i>h90 ade6-M216 leu1 mei4::ura4+ rrp6-YFP-bsdR red1-mCherry-hphR natR-CFP-mmi1</i>       | 1A, S1A                                            | This study   |
| JS130       | <i>h90 ade6-M210 leu1 ura4-D18 mei4::ura4+ mmi1::kanR rrp6-YFP-bsdR red1-mCherry-hphR</i> | 1A, S1A                                            | This study   |
| JS131       | <i>h90 ade6-M216 leu1 pab2::kanR rrp6-YFP-bsdR red1-mCherry-hphR natR-CFP-mmi1</i>        | 1A, S1A                                            | This study   |
| JS132       | <i>h90 ade6-M216 leu1 red1::bsdR dis3-GFP-kanR</i>                                        | 1B, S1B                                            | This study   |
| JS133       | <i>h90 ade6-M216 leu1 red1::bsdR rrp4-GFP-kanR</i>                                        | 1B, S1B                                            | This study   |
| JS134       | <i>h90 ade6-M216 leu1 pla1-YFP-kanR red1-mCherry-hphR natR-CFP-mmi1</i>                   | 1C, S1C                                            | This study   |
| JS135       | <i>h90 ade6-M216 leu1 red1::bsdR pla1-YFP-kanR natR-CFP-mmi1</i>                          | 1C, S1C                                            | This study   |
| JS136       | <i>h90 ade6-M216 leu1 pab2-YFP-kanR red1-mCherry-hphR natR-CFP-mmi1</i>                   | 1D, S1D                                            | This study   |
| JS137       | <i>h90 ade6-M216 leu1 red1::bsdR pab2-YFP-kanR natR-CFP-mmi1</i>                          | 1D, S1D                                            | This study   |
| JS138       | <i>h90 ade6-M216 leu1 red1-YFP-kanR</i>                                                   | 2A, 2B, 2E, 3B, S2A, S3A, S3B, S3D                 | This study   |
| JS139       | <i>h90 ade6-M216 leu1 red1(Δ2-195)-YFP-kanR</i>                                           | 2A, 2B, S2A                                        | This study   |
| JS140       | <i>h90 ade6-M216 leu1 red1(Δ2-347)-YFP-kanR</i>                                           | 2A, 2B, S2A                                        | This study   |
| JS143       | <i>h90 ade6-M216 leu1 red1(Δ196-347)-YFP-kanR</i>                                         | 2A, 2B, S2A                                        | This study   |
| JS144       | <i>h90 ade6-M216 leu1 red1(Δ196-245)-YFP-kanR</i>                                         | 2A, 2B, 2E, 3B, S2A, S3A, S3B, S3D                 | This study   |
| JS145       | <i>h90 ade6-M216 leu1 red1(Δ246-295)-YFP-kanR</i>                                         | 2A, 2B, S2A                                        | This study   |
| JS146       | <i>h90 ade6-M216 leu1 red1(Δ296-347)-YFP-kanR</i>                                         | 2A, 2B, S2A                                        | This study   |

|       |                                                                                     |                   |            |
|-------|-------------------------------------------------------------------------------------|-------------------|------------|
| JS149 | <i>h90 ade6-M210 leu1 iss10::kanR rrp6-YFP-bsdR red1-mCherry-hphR natR-CFP-mmil</i> | 2D, S2C           | This study |
| JS150 | <i>h90 ade6-M216 leu1 ura4-D18 red1(d196-245)-mCherry-hphR rrp6-YFP-bsdR</i>        | 2C, S2B           | This study |
| JS151 | <i>h90 ade6-M210 leu1 rrp6::kanR</i>                                                | S3C, S5A, S5B     | This study |
| JS154 | <i>h90 ade6-M216 leu1 rrp6::bsdR dis3-GFP-kanR</i>                                  | 5A, S7A           | This study |
| JS155 | <i>h90 ade6-M216 leu1 rrp6::bsdR rrp4-GFP-kanR</i>                                  | 5A, S7A           | This study |
| JS156 | <i>h90 ade6-M216 leu1 rrp6::bsdR red1-YFP-natR LEU2-CFP-mmil</i>                    | 5B, S7B           | This study |
| JS157 | <i>h90 ade6-M216 leu1 red1::bsdR dis3-mCherry-hphR</i>                              | 5C, S7C           | This study |
| JS158 | <i>h90 ade6-M216 leu1 red1::bsdR rrp4-mCherry-hphR</i>                              | 5C, S7C           | This study |
| JS177 | <i>h90 ade6-M216 leu1 ura4-D18 red1::bsdR mmil::kanR mei4::ura4+</i>                | 4C, S6D           | This study |
| JS180 | <i>h90 ade6-M216 leu1 mtl1-cs5-YFP-kanR rrp6-mCherry-hphR</i>                       | 6A                | This study |
| JS182 | <i>h90 ade6-M216 leu1 mtl1-cs5-YFP-kanR</i>                                         | 6B, S8            | This study |
| JT719 | <i>h90 ade6-M216 leu1 rrp6-mCherry-hphR</i>                                         | 6A                | Lab stock  |
| JT731 | <i>h90 ade6-M216 leu1 dis3-GFP-kanR</i>                                             | 1B, S1B           | Lab stock  |
| JT856 | <i>h90 ade6-M216 leu1 rrp4-GFP-kanR</i>                                             | 1B, S1B           | Lab stock  |
| JV579 | <i>h90 ade6-M216 leu1 mmil-ts3-(3HA)-adhT&lt;&lt;kanR</i>                           | S5C, S5D          | Ref. 3     |
| JV832 | <i>h90 ade6-M216 leu1 ura4-D18 red1::ura4+</i>                                      | 3A                | Ref. 22    |
| JV969 | <i>h90 ade6-M216 leu1 iss10::kanR</i>                                               | 2E, S3A, S3B, S3D | Ref. 22    |
| JY450 | <i>h90 ade6-M216 leu1</i>                                                           | 3A, S3C, S4A, S4B | Lab stock  |
