# Supplementary material for: Meiotic gene silencing complex MTREC/NURS recruits the nuclear exosome to YTH-RNA-binding protein Mmi1
Source: PubMed Central journal article supplement (PMC7018101; doi:10.1371/journal.pgen.1008598), 2020-02-03
Supplement: pgen.1008598.s010.pdf [file pgen.1008598.s010.pdf]

**S2 Table. Primers used in this study.**

| Primer name     | Sequence                    |
|-----------------|-----------------------------|
| act1 F          | TGAGGAGCACCCCTTGCTTGT       |
| act1 R          | TCTTCTCACGGTTGGATTGG        |
| mei4 F          | AACCAAATGCTGAAACTCAAGAA     |
| mei4 R          | CGTTGACGTTTTTCATAAAGGCTA    |
| ssm4 F          | GTGCAAAATTGAAACTATCAAAACA   |
| ssm4 R          | TTGGTTCATTTCTGTAAGGTCGT     |
| rec8 F          | AACGAACCCAAAGCAGTTACTACTC   |
| rec8 R          | GATCCACAGAAGGTAGATTAAATGCA  |
| spo5 F          | GGTTCTAGCGAGTTAGGGCTTTC     |
| spo5 R          | CCTGTGCTGCTGTAGAATAAGTATTGT |
| cti6 PROMPT F   | CATCGGAGAACCTGGTTTGT        |
| cti6 PROMPT R   | TGCATTCCCAAATCAAGTCA        |
| rpl402 PROMPT F | GAAAGAGGAACAATGTTTAGAAGTCA  |
| rpl402 PROMPT R | AAGCCCTACGATTGCTGTGT        |
